# Supplementary material for: Genome-assisted identification of wheat leaf rust resistance gene Lr30 (synonym Lr.ace-4A)
Source: Research Square preprint supplement (doi:10.21203/rs.3.rs-6289485/v1), 2025-03-27
Supplement: Supplementary file 1 [file 873d6aaf44c1ab56d0c9a1d0.xlsx]

## Sheet: Supplementary Data1
Supplementary Data 1. Primers used in this study. CAPS, cleaved amplified polymorphic sequence.
Marker	Type (enzyme)	Primer sequence 5'-3' (Forward)	Primer sequence 5'-3' (Reverse)	Size (bp)	Tm (℃)	Function
pku8123	CAPS (MspA1I)	AAGTACGACCACGAGGAGATG	CCATGAAAGGGCCGTTGA	728	60	Mapping
pku5601	CAPS (XmaI)	CGCCCACGATATTCACCTACTAT	CACGCCTCTTCCTTCTTCTCAT	712	60	Mapping
pku7069	CAPS (DpnI)	AAACTCCTAAGAGGCAAATG	CTGTGATGCTAACGATCAGGTC	563	60	Mapping
pku0374	CAPS (AcuI)	GCATCACCTCTGCATTCT	ATCAACTGTCCTGAGCGTA	1160	56	Mapping
pku0332	CAPS (BtgI)	ACCTCTCGCTCTCGTAACC	CGTGTCTTGTCCCCTGTCT	1568	56	Mapping
pku4169	CAPS (HpaI)	TTGTACGTGTCGAGGATAGG	TGCTGATAAGTATTTGCCGA	792	56	Mapping
pku8170	CAPS (TaqI)	TTCCTATCTTCTGCCCACTG	CTACCATTATGTTCATTTCGC	648	56	Mapping
pku0988	CAPS (AvaII)	ACTGACACGTAGCCACGCAA	TGCAACGAGCACTTCTCAATT	567	60	Mapping
pku1280	CAPS (PleI)	TTCTCATATATTCTGATTTTACGTC	GGGCATGTCTACAGTTTACGT	503	55	Mapping
pku1343	CAPS (SfaNI)	AGCTCCTCCCTACCACAGAC	AAGTCTATCAGGTGAGAAGGAAG	445	60	Mapping
pku1587	CAPS (HincII)	ATTTGAAGTAGAAAAGCGGGT	TTCCTTGCAGAATCAACCTT	549	50	Mapping
pku1693	CAPS (HaeIII)	TTCCCCATTCTCGCATTCT	CTTTATTGGTCTAAGCGTGTCTCT	385	60	Mapping
pku2574	Dominant	CTACCTGATGCAATCTAGCGAT	GCTTCATTGGTGTTCCTCAGTA	496	60	Mapping
Lr30MAS-47FR		CCTTATTGCCTAGATCCTTTG	GCTTAAGGGAATCTGGACG	916	54	Diagnostic marker (MAS)
pku4AF1R1		ATGTCCACTCACACACTCCA	CATAAACCGAGTGGTCAGCA	1324	57	EMS mutation/Haplotyping
pku4AF2R2		TCATTATCAGGTTCCAGTTG	AATGCACGAGCACTAACAG	999	52	EMS mutation detection/Haplotyping/Editing mutation detection/Transgene detection
pku4AF3R3		TGTATATTTTGCAACTGAACCA	CACTGAAACAACAGGATAGC	2001	58	EMS mutation/Haplotyping/Transgene detection
pku65FR		TTCCTCAGGATTGTGAAGTC	AAGCTGCTCTAGCATTCG	283	58	Transgene detection
pku66FR		TGTGAGCGGATAACAATTTCA	GGGCAATATGAAATTGCTG	785	60	Transgene detection
pku16FR		GTCGATGCTCACCCTGTTGT	TTGAGATCCCTCTCTGAAGGC	1117	58	Over-expression transgene detection
pku20FR		CTTACCAAATGGTCAAGGT	AGAGAGAGACTGGTGATTTCAG	310	58	Over-expression transgene detection
pku22FR		GTCTCTTCCACCAAGAGGTACA	ATTACTTGTGGAAGCCCGCC	121	60	Expression analysis
pku51FR		CTTATTGCCTAGATCCTCTG	TCTTCCTTTGTACCTCTTGG	161	60	Expression analysis
p1300‑Lr4AF1R1		TGACCATGATTACGAATTCGAGCTCCTCCTAGGGGAAAGAGGCCAG	CACAATTTGTGACCTCAGGATGGTAGCAGC	4236	68	Transgenic fragment
p1300‑Lr4AF2R2		TCCTGAGGTCACAAATTGTGTGCATCAGGGCT	ACGACGGCCAGTGCCAAGCTTCTGTCGTGCACTTCTGGAGTG	5094	68	Transgenic fragment
pku23F1R1		TGACCATGATTACGAATTCGAGCTCCTCCTAGGGGAAAGAGGCCAG	ACACTTTTTTTAGAGGATCTAGGCAATAAGGC	5218	60	Transgenic fragment (single-mutation version)
pku23F2R2		AGATCCTCTAAAAAAAGTGTTATCATTGCCATTAC	ACGACGGCCAGTGCCAAGCTTCTGTCGTGCACTTCTGGAGTG	4112	60	Transgenic fragment (single-mutation version)
pku24F1R1		TGACCATGATTACGAATTCGAGCTCCTCCTAGGGGAAAGAGGCCAG	GAATCTGGGCAACTGCGGAAGTAGGAATACATCC	6095	60	Transgenic fragment (single-mutation version)
pku24F2R2		TTCCGCAGTTGCCCAGATTCCCTTAAGCCATG	ACGACGGCCAGTGCCAAGCTTCTGTCGTGCACTTCTGGAGTG	3235	60	Transgenic fragment (single-mutation version)
OE-4AFR		GGTGTTACTTCTGCAAAGCTTATGGCGGACCTCGCGGTG	ATTCCCGGGTTACTTGTACACTATTCCTCCTGCTCCAAA	3566	62	Over-expression transgenic fragment
Cas9-4AF1R1		GCCAATGAGACTATTAACCGGTTTCAGAGCTATGCTGGAA	ATGATTACGAATTCAGGCCTAAAAAAAGCACCGACTCGGT	133	58	CRISPR/Cas9 editing PCR fragment
Cas9-4AF2R2		ATTGATTGACAACAGGCCTCATGAATCCAAACCACACGG	CGGTTAATAGTCTCATTGGCTGCTACCTCAGGATGCGCCT	564	58	CRISPR/Cas9 editing PCR fragment
RC1079F1		CAGTTTTGGAGCAGGAGGAATAG				3’ RACE
RC1079F2		TACTGACTGATTGCTGATTGGTCAT				3’ RACE
RC1079R1			CCCCTCCACCACCGATTTG			5’ RACE
RC1079R2			CGCCATTGCTGCCGACTC			5’ RACE
19-CDS-GFP-FR		GAGAACACGGGGGACTCTAGAATGGCGGACCTCGCGGT	CATAGGCCTGGTACCCTCGAGTTCCTCCTGCTCCAAAACTGGTT	3564	60	Cell death
19-GFP-CDS-FR		ACGGCATGGACGAGCTGTACACAATGGCGGACCTCGCGGT	AACGATCGGGGAAATTCGAGCTCCTATTCCTCCTGCTCCAAAA	3566	60	Cell death
19-CC-GFP-FR		GAGAACACGGGGGACTCTAGAATGGCGGACCTCGCGGT	CATAGGCCTGGTACCCTCGAGGTTCTTGGTGATGAGCTGGGT	609	60	Cell death
19-GFP-CC-FR		ACGGCATGGACGAGCTGTACACAATGGCGGACCTCGCGGT	CGATCGGGGAAATTCGAGCTCCTACTTGGTGATGAGCTGGGT	611	60	Cell death
19-LRR-GFP-FR		GAGAACACGGGGGACTCTAGAATGGACTTCTCCAAGCTACG	CATAGGCCTGGTACCCTCGAGTTCCTCCTGCTCCAAAACTGGTT	1182	60	Cell death
19-GFP-LRR-FR		ACGGCATGGACGAGCTGTACACAATGGACTTCTCCAAGCTAC	AACGATCGGGGAAATTCGAGCTCCTATTCCTCCTGCTCCAAAA	1189	60	Cell death
19-NB-GFP-FR		GAGAACACGGGGGACTCTAGAAAAGACGGCGGCCTCCAG	CATAGGCCTGGTACCCTCGAGGATGCTCTCGAACACAATCTTGT	1863	60	Cell death
19-GFP-NB-FR		ACGGCATGGACGAGCTGTACACAAAAGACGGCGGCCTCCAG	TGAACGATCGGGGAAATTCGAGCTCCTAGCTCTCGAACACAATCTTG	1866	60	Cell death
NLR4ace-FR		GGTACCGAATTCATGGCGGACCTCGCGGTG	GGATCCCTAACTAGTTTCCTCCTGCTCCAAAACTGG	3552	60	Subcellular localization in N. benthamiana
163-GFP-CDS-FR		ACGGCATGGACGAGCTGTACACAATGGCGGACCTCGCGGT	ACTGGTGATTTCAGCGAATTCCTATTCCTCCTGCTCCAAACTG	3569	60	Subcellular localization in wheat protoplasts
AD-4A-CDS-FR		GCCATGGAGGCCAGTGAATTCATGGCGGACCTCGCGGTG	CAGCTCGAGCTCGATGGATCCCTATTCCTCCTGCTCCAAAAC	3568	60	Yeast two-hybrid
BD-4A-CDS-FR		ATGGCCATGGAGGCCGAATTCATGGCGGACCTCGCGGTG	CCGCTGCAGGTCGACGGATCCCTATTCCTCCTGCTCCAAA	3563	60	Yeast two-hybrid
